# Supplementary material
Source: PubMed Central journal article supplement (PMC4348008)
Supplement: NIHMS332371-supplement-Supp_Figure_S1-S6.pdf [file NIHMS332371-supplement-Supp_Figure_S1-S6.pdf]

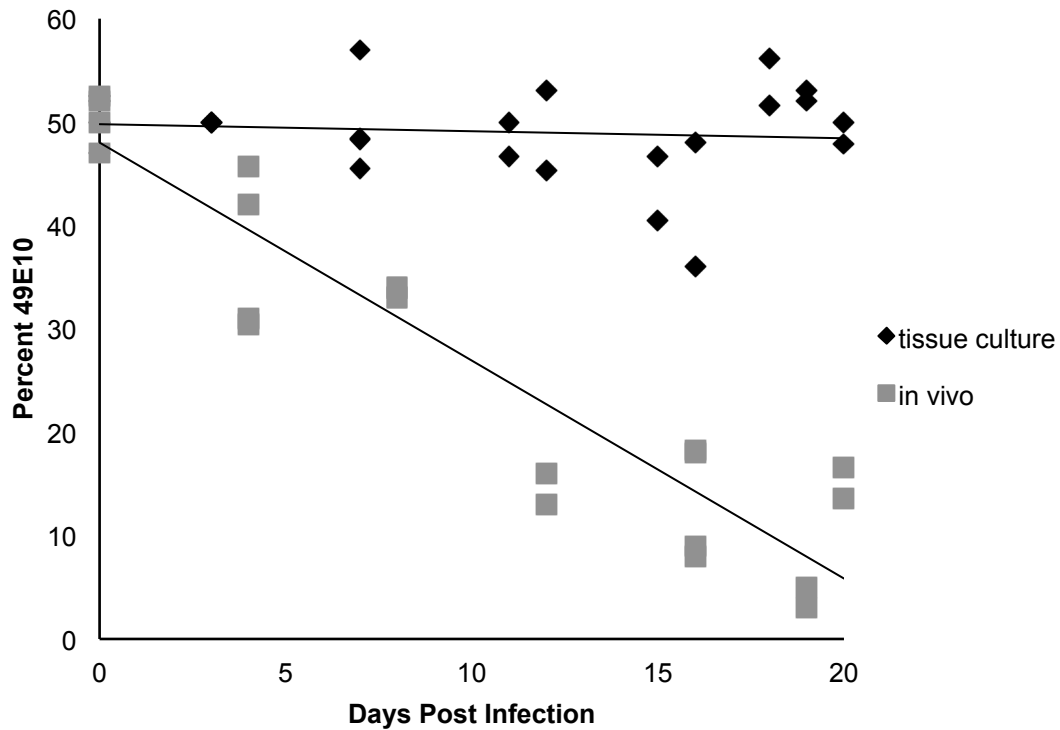

**Fig. S1. The E10 outcompetes the 49E10 mutant in vivo but not in vitro**

Competitive fitness assay show that the 49E10 mutant grows equally well as the parental E10 strain in standard tissue culture conditions (black diamonds), but not *in vivo* if the mice are infected with  $10^6$  mixed parasites (gray squares). Each of the four data points per time point represents an independent tissue culture flask or mouse that was serially passaged. R-squared value for the *in vivo* experiment is 0.8702.

```

Tg 1 MASPSALGSAPSSIFSSSAATVPLSRYRNIGIMAHIDAGKTTTTERILFYTGVSCLGEVHDGEATMDFMAQERERGITITSAATTCYW
Ec 1 -----MARTTPIARYRNIGISAHIDAGKTTTTERILFYTGVDGAVNHKIGEVHDGATMDWMEQEQERGITITSAATTAFW
      * * . * : : * * * * * * * * * * * * * * * * * * . : : * * * * * * * * * * * * * * * * * * : : *
Tg 90 EGMKKNYPHRINIIDTPGHVDFTVEVERSLRVLVDGAVGVFDSVAGVEPQSETVWRQGNKFSIPRLAYVNKMDRLGADFWGCVQRIRRR
Ec 73 SGMKQYEPHRINIIDTPGHVDFTIEVERSMRVLVDGAVMVYCAVGGVQSQSETVWRQANKYKVPRIAFVNKMDRMGANFLKVVNQIKTR
      . * * * * * * * * * * * * * * * * * * * * * * * * * * * * * * * * * * * * * * * * * * * * * * * * *
Tg 179 LGSNGVPVQLPIGKEISFRGVFDLVRMRAIYWEEESLGATFVETDEIPEGMQDEVHRHRQRLLKAAEGSEELIAKYLETETLSEDEIR
Ec 162 LGANPVPLQLAIGAEHFTGVVDLVKMKAINWN-DADQGVTFEYEDIPADMVELANEWHQNLIESAAEASEELMEKYLGGEELTEAEIK
      * * . * * * * * * * * * * * * * * * * * * * * * * * * * * * * * * * * * * * * * * * * * * * * * *
Tg 268 LGLRLQTLKNQLVPIFCGSAFKNKGVAVLGDILDYLPSPLEVPQPADAIRKIHEEFPGARDAPATGPLSALVFKMTDPPFVGVQNFVR
Ec 250 GALRQRVLNNEIILVTCGSAFKNKGVAQLDAVIDYLPSPVDVPAIN-GILDDGKDTPAERHASDDEPFSAFALKIATDPPFVGNLTFRR
      . * * * * * * * * * * * * * * * * * * * * * * * * * * * * * * * * * * * * * * * * * * * * * *
Tg 357 VYTGELRPGSVVMNVRTGKEERIQRVLIHANARKDVPSLRAGDIGAVLGPKDFLTGDTMCEKKHPVHLEPIEFPAPVISLAVEAKVRA
Ec 338 VYSGVVNSGDTVLNSVKAARERFRIVQMANKREEIKEVRAGDIAAAGLKDVTGTGDTLCDPDAPIILERMEFPPEPVISIAVEPKTKA
      * * . * * * * * * * * * * * * * * * * * * * * * * * * * * * * * * * * * * * * * * * * * * * *
Tg 446 EHKMTSALSCLKSREDPSLSVTVDRETKQLIILGGMGELHLEIVLDRKREFGVEAASGAPQVAYRETITAAGTGRG-KYIKQSGGRGQY
Ec 427 DQEKMGALGLAKEDPSFRVWTDEESNQTIIAGMGELHLDIIVDRMKREFNVEANVGKPVQVAYRETIRQKVTDVEGKHAKQSGGRGQY
      : : * * * * * * * * * * * * * * * * * * * * * * * * * * * * * * * * * * * * * * * * * * * * * *
Tg 534 GDVCLTIEPLERGS---GNRFVNAIRGAVIPNEFIPAVEAGVMEQLQNGVLVLAGYPLTDVQVTVFDGTYHAVDSSELAFRIAACLALKDA
Ec 516 GHVVIDMYPLEPGSNPKGYEFINDIKGGVIPGEYIPAVDKGIQEQLKAGPLAGYPVDMGIRLHFSGSYHDVDSSELAFLAASIAFKEG
      * . * * * * * * * * * * * * * * * * * * * * * * * * * * * * * * * * * * * * * * * * * * * * *
Tg 620 AKHAGLVLLEPLMALHVISPQSYVGSVIGDLTSRRGIVQKVSQEFAGSAGDDVYDGEGETTRGRQEEDGITEVDVLVPLAEMFGYTT
Ec 605 FKKAKPVLLEPIMKVEVETPEENTGDVIGDLSRRRGLKQGESEVTG-----VKIHAEVPLSEMFGYAT
      * . * * * * * * * * * * * * * * * * * * * * * * * * * * * * * * * * * * * * * * * * * * * *
Tg 709 VLRSLSQGRATSSMQLAKYMPTPKHVEEEIQAQRTGGTGKQP
Ec 669 QLRSLTKGRASYTMEFLKYDEAPSNVAQAVIEARGK
      * * * * * * * * * * * * * * * * * * * * * * * * * * * * * * * * * * * * * * * * * * * *

```

**Fig. S2. ClustalW alignment of TGME49\_023970 and EFG from E. coli**  
 TGME49\_023970 from *T. gondii* is marked as “Tg” and *fusA* (EFG) from *E. coli* is marked as “Ec.” Identical residues are marked with a “\*”. Highly conserved residues are marked with a “:”. Weakly conserved residues are marked with a “.”.

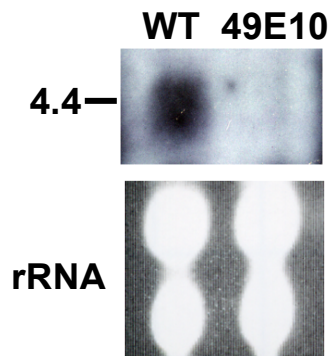

**Fig. S3. TGME49\_023970 is disrupted in 49E10**

RNA from Pru $\Delta$ HPT (WT) and 49E10 parasites were analyzed by northern blot analysis using a probe downstream of the insertion site of TGME49\_023970 in 49E10. Ethidium bromide staining of the rRNA is shown beneath as a loading control.

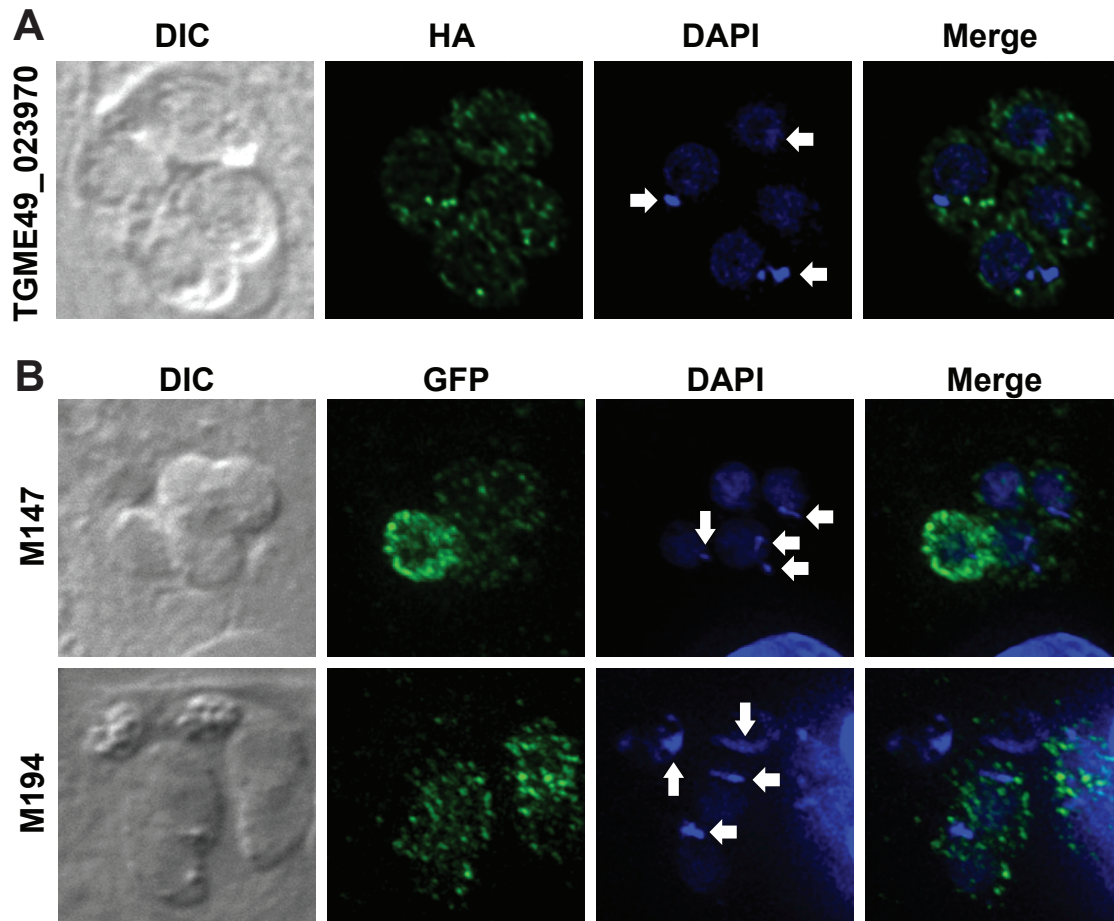

**Fig. S4. TgEFG does not target to the apicoplast when translated from M147, M194 or M262.**

A. An HA-tagged version of TGME49\_023970 was stably expressed in WT parasites using a heterologous promoter and UTRs. The IFA used an anti-HA antibody to visualize the HA-tagged protein (green) and DAPI to visualize nucleic acid (blue). White arrows indicate the apicoplasts in the DAPI panel. The prediction TGME49\_023970 starts at M262 of the *TgEFG* mRNA.

B. *T. gondii* expressing various TgEFG-GFP fusion constructs were examined by IFA using an anti-GFP antibody to visualize the TgEFG-GFP fusion (green) and DAPI to visualize nucleic acid (blue). The rows are labeled according to the ATG codon used to create the TgEFG-GFP fusions with M147 (top row) corresponding to the second in-frame ATG codon, M194 (bottom row) corresponding to the third in-frame ATG codon. White arrows indicate the apicoplasts in the DAPI panel and elongated apicoplasts are in the process of dividing.

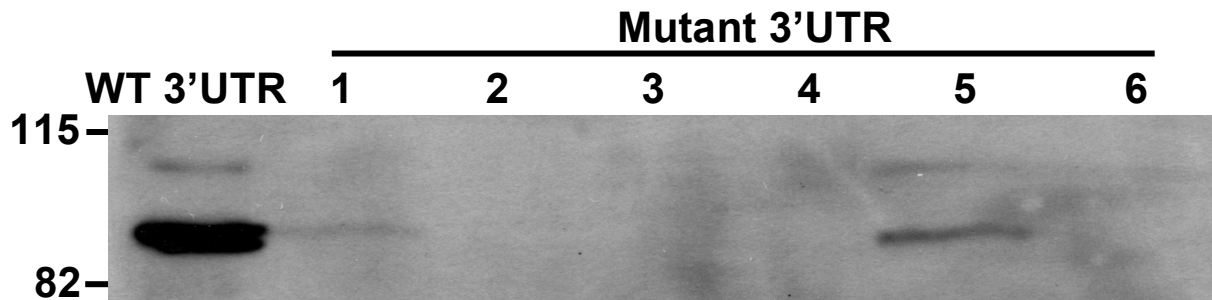

**Fig. S5. Insertion into the 3'UTR of TgEFG affects protein expression**

One clone of TgEFG expressed with its endogenous 3'UTR (WT 3'UTR) and six different clones of TgEFG expressed with the mutant 3'UTR found in 49E10 (Mutant 3'UTR #1-6) were analyzed by western immunoblot.  $1 \times 10^7$  tachyzoites were loaded per lane and protein was visualized using a mouse anti-HA monoclonal antibody to detect the HA epitope tagged TgEFG. Size markers are shown to the left in kilodaltons.

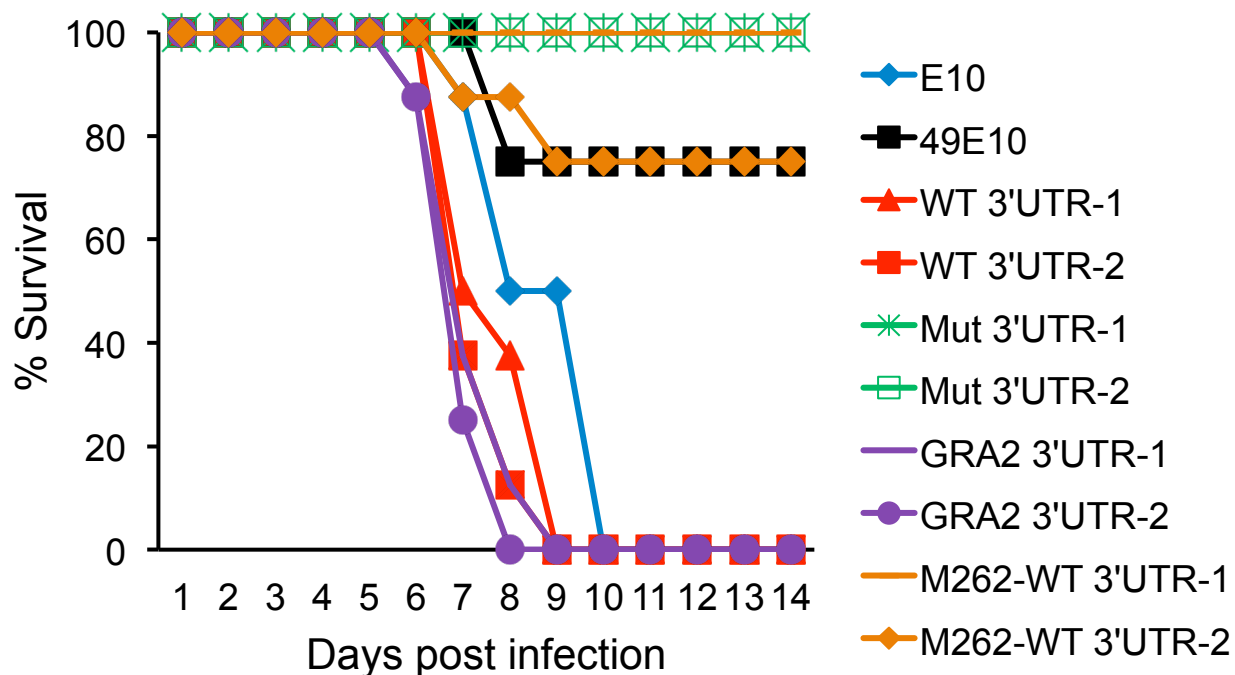

**Fig. S6. TgEFG protein but not the endogenous 3'UTR itself restores virulence to 49E10.** The virulence of E10 (blue diamond) and 49E10 (black square) parasites was compared to two independent clones of 49E10 complemented with TgEFG expressed with its endogenous 3'UTR (WT 3'UTR, red), the mutant 3'UTR found in 49E10 (Mut 3'UTR, green), the GRA2 3'UTR (purple) or the shortened M262 form of TgEFG with an endogenous 3'UTR (M262-WT 3'UTR, orange). For this acute mouse model,  $1.5 \times 10^6$  tachyzoites were i.p. injected into four mice per strain. Two independent experiments were combined for a total of eight mice per strain.
